1 **Neonatal outcomes after proteomic biomarker-guided intervention: the AVERT**  
2 **PRETERM TRIAL**

3

4 Matthew K. HOFFMAN, MD, MPH<sup>1</sup>; Carrie KITTO<sup>1</sup>; Zugui ZHANG, PhD<sup>1</sup>; Jing SHI<sup>2</sup>,  
5 PhD; Michael G. WALKER<sup>2</sup>, PhD; Babak SHAHBABA<sup>3</sup>, PhD; Kelly RUHSTALLER, MD  
6 MSCE<sup>1</sup>

7 <sup>1</sup>Department of Obstetrics and Gynecology, ChristianaCare, Newark, DE

8 <sup>2</sup>Walker Bioscience, Carlsbad, CA

9 <sup>3</sup>Departments of Statistics and Computer Science, University of California Irvine, Irvine,  
10 CA

11

12 **Conflicts of Interest**

13 BS, JS, and MGW are paid consultants of Sera Prognostics, Inc. For the purposes of  
14 this study, JS and MGW reported to MKH and were paid consultants of ChristianaCare,  
15 and BS was supported by Sera Prognostics, Inc. MKH received an investigator-initiated  
16 grant from Sera Prognostics, Inc., to conduct this study.

17

18 **Source of Funding**

19 This study was performed as an investigator-initiated trial funded by Sera Prognostics,  
20 Inc. The funder provided testing and funds to conduct the trial. The study plan was

21 mutually agreed upon by the investigators and the funder; however, the funder was  
22 blinded to study results until after data lock and analysis completion.

23

24 **Corresponding Author**

25 Matthew K. Hoffman, MD MPH

26 Department of Obstetrics & Gynecology

27 4755 Ogletown-Stanton Road

28 Newark, DE 19718

29 Telephone: +1 (302) 301-3350

30 Fax: +1 (302) 733-3340

31 Email: [mhoffman@christianacare.org](mailto:mhoffman@christianacare.org)

## 32 **Abstract**

### 33 **1. Background**

34 Vaginal progesterone, low dose aspirin and care management (comprising increased  
35 outreach and education) has been shown to reduce the rate of prematurity in select  
36 populations, but identifying at-risk pregnancies has been problematic.

### 37 **2. Objective(s)**

38 Test the hypothesis that screening singleton, non-anomalous pregnancies lacking  
39 traditional clinical risk factors with a validated blood test for preterm birth risk prediction,  
40 then targeting those with elevated risk for preventive treatment, would improve neonatal  
41 outcomes as compared to a large historical population.

### 42 **3. Study Design**

43 The AVERT PRETERM trial took place from June 2018-September 2020 at  
44 ChristianaCare Hospital (Newark, DE). Singleton non-anomalous pregnancies with no  
45 history of preterm birth were enrolled in a prospective study arm and followed through  
46 neonatal hospital discharge. Participants were screened using a serum proteomic test  
47 for spontaneous preterm birth risk during a gestational age window spanning 19<sup>1/7</sup>-20<sup>6/7</sup>  
48 weeks. Pregnancies identified by the test to be at elevated risk for preterm birth  
49 ( $\geq 16.0\%$ , approximately twice the U.S. population risk) were offered aspirin 81 mg daily,  
50 open-label vaginal progesterone 200 mg daily and care management. We compared  
51 outcomes for women who screened either low-risk or higher-risk accepting treatment  
52 with those in a historical study arm of 10,000 pregnancies. Our co-primary outcomes  
53 were neonatal hospital length of stay and an ordinal neonatal morbidity index score

54 based on the occurrence of grade III/IV interventricular hemorrhage, necrotizing  
55 enterocolitis (Bell stage II/III), respiratory distress syndrome, bronchopulmonary  
56 dysplasia, retinopathy of prematurity (stage III), sepsis, and neonatal death or neonatal  
57 intensive care unit length of stay. Cox proportional hazards survival analysis and ordinal  
58 logistic regression were utilized to evaluate outcomes and control for population  
59 differences.

#### 60 **4. Results**

61 A total of 1463 women were screened and tested before research operations were  
62 ceased due to the advent of the COVID-19 pandemic, and three women were  
63 subsequently deemed ineligible after screening. Of these, 34.72% (507/1460) were  
64 deemed high-risk, with 56.41% (286/507) accepting intervention and 43.59% (221/507)  
65 forgoing intervention. The remaining 65.3% (953/1460) were designated as low-risk.  
66 Women in the prospective arm were older, more obese, more likely to have  
67 hypertension and smoke, and less likely to use opioids compared to women in the  
68 historical arm. The primary analyses found that neonates in the prospective arm were  
69 discharged from the hospital earlier ( $P=0.01$ ; hazard ratio, 1.35; 95% confidence  
70 interval, 1.08-1.70) and had lower neonatal morbidity index scores ( $P=0.031$ ; odds ratio,  
71 0.81; 95% confidence interval, 0.67-0.98). Average neonatal hospital length of stay  
72 decreased by 21%, and severe neonatal morbidity (neonatal morbidity index  $\geq 3$ ) was  
73 reduced on average by 18%.

#### 74 **5. Conclusions**

75 Identifying singleton, non-anomalous pregnancies lacking traditional risk factors with a  
76 validated proteomic blood test for preterm birth risk and providing treatment to those at  
77 risk resulted in improved neonatal outcomes compared to controls in a racially diverse  
78 cohort. This test-and-treatment strategy shows promise for ameliorating the impacts of  
79 premature birth among individuals in this previously unidentified patient population.

80

81 **Keywords**

82 Care management, low-dose aspirin, neonatal morbidity index, NICU length of stay,  
83 pregnancy, preterm birth, proteomic biomarker, risk stratification, spontaneous preterm  
84 birth, vaginal progesterone

## 85 **Introduction**

86           Preterm birth (PTB) remains the leading cause of perinatal mortality,<sup>1,2</sup> and  
87 children born prematurely are at greater risk for chronic medical conditions<sup>3,4</sup> and  
88 developmental delays.<sup>5</sup> These risks are inversely proportional to the neonate's  
89 gestational age (GA) at birth.<sup>6</sup> Improvements in survival are largely attributable to the  
90 use of improved neonatal care<sup>7</sup> and antenatal corticosteroids.<sup>8</sup> Strategies targeting at-  
91 risk women, such as focused care management<sup>9</sup> (comprising increased outreach and  
92 education) along with low-dose aspirin (LDASA),<sup>10</sup> and vaginal progesterone<sup>11,12</sup> have  
93 demonstrated reductions in PTB, but their impact has been limited by poor precision in  
94 identifying at-risk pregnancies. Shortened cervical length measured by transvaginal  
95 sonography in the second trimester has been shown to predict the risk of preterm  
96 delivery.<sup>13</sup> With vaginal progesterone treatment, the PTB rate <34 weeks' gestation is  
97 decreased by approximately 45%, but the rate of PTB <37 weeks' gestation is  
98 unchanged.<sup>14</sup> The utility of this strategy is blunted by the limited ability of cervical  
99 sonography to identify women who will deliver preterm, with most women delivering  
100 prematurely not having a short cervix at the time of routine sonography.<sup>15,16</sup> Similarly,  
101 LDASA has been shown to decrease PTB incidence and severity<sup>17,18</sup> but generally has  
102 been recommended for pregnancies at risk for preeclampsia.<sup>19</sup> Finally, care  
103 management of higher-risk pregnancies has been shown to decrease PTB; historically,  
104 however, its use has targeted pregnancies with known PTB risk factors,<sup>9,20</sup> which are  
105 frequently absent in those who deliver prematurely.

106           Recently, novel discoveries in proteomics have come to identify and validate  
107 proteins that are differentially expressed in pregnancies that deliver prematurely

108 compared to term births. One validated spontaneous PTB (sPTB) predictor, which  
109 evaluates the ratio of serum insulin-like growth factor binding protein 4 (IGFBP4) to sex  
110 hormone-binding globulin (SHBG) in the window of 19<sup>1/7</sup>-20<sup>6/7</sup> weeks' gestation,  
111 stratified risk in U.S. women with a precision (area under the receiver operating  
112 characteristic curve [AUC]) of 0.80.<sup>21</sup> A risk score threshold corresponding to twice the  
113 U.S. population PTB risk was subsequently validated<sup>22</sup> and shown to significantly  
114 stratify higher- and lower-risk subjects for an extended blood draw window of 18<sup>0/7</sup>-20<sup>6/7</sup>  
115 weeks' gestation.

116           Nonetheless, the question of whether targeting treatment can improve neonatal  
117 outcomes for women indicated by the test to be at increased risk for preterm delivery  
118 but who lack traditional clinical risk factors remains largely uninvestigated. The purpose  
119 of the AVERT PRETERM trial was to test the hypothesis that screening singleton non-  
120 anomalous pregnancies with a validated blood test for PTB risk prediction, and then  
121 treating higher-risk pregnancies with care management, LDASA, and vaginal  
122 progesterone, would improve neonatal outcomes compared to a large historical  
123 population.

124

## 125 **Materials and Methods**

126 The AVERT PRETERM trial was conducted from June 2018-September 2020 at  
127 ChristianaCare Hospital, a regional health care system based in Newark, DE.  
128 ChristianaCare serves a mixed urban and rural population across Delaware and  
129 Maryland.

130

131 ***Trial Oversight***

132 The study protocol (NCT03151330) was approved by the ChristianaCare institutional  
133 review board prior to participant enrollment. An independent data safety monitoring  
134 board convened prior to study initiation, approved the protocol, and provided oversight  
135 of adverse events. All subjects provided written informed consent to participate in the  
136 study. The listed authors accept responsibility for the accuracy and completeness of the  
137 data and for fidelity in the conduct of the trial.

138 In April 2020, all non-COVID research was halted at ChristianaCare Health  
139 System, and the decision was made to terminate the trial and reassess the analytic plan  
140 in a blinded fashion. In July 2020, an investigation<sup>23</sup> showed that COVID-19 infection led  
141 to an increase in prematurity. To avoid bias in comparison of pre-pandemic controls to  
142 prospective subjects who reached term during the pandemic period, we modified the  
143 statistical analysis plan (SAP), while blinded, by limiting the primary analysis to subjects  
144 who had reached 37 weeks' gestation before the local spread of SARS-CoV-2 and the  
145 associated research shutdown.

146

147 ***Screening and Recruitment***

148 Two separate study arms were defined, both of which comprised singleton pregnancies  
149 without ultrasound evidence of mullerian or fetal anomalies, cervical shortening (<25  
150 mm), genetic anomalies, history of a prior PTB, cervical cerclage or medical conditions  
151 with clear indication for PTB <37 weeks' gestation. Pregnancies in the prospective arm



152 were identified and screened for eligibility in ambulatory sites and/or at the time of  
153 routine imaging ultrasound. Due to the requirements of the proteomic blood test for  
154 prematurity (PreTRM), women in the prospective arm were excluded if they had a blood  
155 transfusion during the current pregnancy, known hyperbilirubinemia, or were taking  
156 traditional or low molecular weight heparin. Similarly, prospective patients were  
157 excluded if they had a known reaction or contraindication to progesterone or aspirin.

158

### 159 ***Procedures***

160 Following consent, blood was obtained from women in the prospective arm during the  
161 window of 19<sup>1/7</sup>-20<sup>6/7</sup> weeks' gestation. Samples were processed, shipped, stored, and  
162 analyzed using the PreTRM test in a Clinical Laboratory Improvement Amendments-  
163 and College of American Pathologists-certified laboratory (Sera Prognostics, Inc., Salt  
164 Lake City, UT), as described previously.<sup>21,24</sup> Test results were shared with the  
165 participant and her care provider. Pregnancies with a sPTB risk score  $\geq 16.0\%$   
166 (approximately twice the U.S. population risk) were then offered and consented again to  
167 receive care management, consisting of twice-weekly nursing contacts to monitor  
168 medication compliance and symptom development, aspirin 81 mg daily, and  
169 progesterone 200 mg intravaginally daily. The remainder of care was determined by the  
170 treating clinician. Outcomes for both study arms were obtained through a validated  
171 obstetrical registry<sup>25</sup> or, for patients in the prospective arm who delivered at another  
172 institution, through review of individual medical records. External data review was  
173 performed for all prospective patients in addition to 10% of the historical arm to ensure  
174 that eligibility requirements were met. An error rate of  $<3\%$  was deemed acceptable. All

175 PTB cases in both arms were reviewed further for accurate assessment of primary  
176 outcomes by a single investigator (MKH). Additionally, because secular changes in care  
177 might affect outcomes in a non-random fashion amongst women in the prospective arm,  
178 major changes in guidance or management protocols were documented on a quarterly  
179 basis.

180

### 181 ***Trial Outcomes***

182 Two co-primary outcomes were selected, the first being neonatal hospital length of stay  
183 (NNLOS). Because of the competing risk of death resulting in shorter stays, we set the  
184 NNLOS for fetuses or newborns who expired to be one day longer than the longest  
185 neonatal stay observed among all neonates. The second co-primary outcome was  
186 based on a neonatal morbidity index (NMI)<sup>14</sup> composed of the following components:  
187 grade III/IV intraventricular hemorrhage, necrotizing enterocolitis (Bell stage II/III),  
188 respiratory distress, bronchopulmonary dysplasia (need for oxygen at 28 days of life or  
189 36 weeks post-conceptual age), retinopathy of prematurity (stage III), proven sepsis  
190 (positive blood cultures) and postnatal death. To provide severity estimates, NMI  
191 scoring was organized as follows: 0, no events; 1, one event or neonatal intensive care  
192 unit (NICU) admission <5 days with no perinatal mortality; 2, two events or five to 20  
193 days of NICU admission with no perinatal mortality; 3, three events or >20 days in the  
194 NICU without perinatal mortality; and 4, perinatal mortality.

195

### 196 ***Power and Sample Size Analysis***

197 At termination, 1873 eligible subjects had been enrolled in the prospective arm, with  
198 1460 reaching 37 weeks' gestation prior to the first reported COVID-19 case in  
199 Delaware. A total of 10000 consecutive historical controls who met the same eligibility  
200 criteria were selected from an approximately two-year period immediately prior to study  
201 initiation.

202 From institutional data on pregnancies at ChristianaCare, we estimated a  
203 historical PTB rate of 9.1%. Sample size estimation was based on simulations of the co-  
204 primary outcomes using a simulated GA distribution with a singleton PTB rate of 9.1%  
205 and an effect of intervention based on existing literature.  $\alpha$ -level spending of 0.05 was  
206 shared between co-primaries using Holm's method.

207 For the first co-primary outcome, the proportion of subjects with NMI scores  $\geq 3$   
208 was assumed to be 2.0-2.3% in the prospective arm and near 3.6% in the control arm,  
209 based on a previous clinical utility study.<sup>26</sup> Assuming these proportions and a one-sided  
210 Fisher's Exact test, a sample size of approximately 1453 subjects with outcomes in the  
211 prospective arm with 55% compliance among higher-risk subjects, and approximately  
212 10000 historical controls, would provide power of 0.7-0.9.<sup>27</sup>

213 For the second co-primary outcome, NNLOS from time of birth up to discharge,  
214 the hazard ratio (HR) based on simulations was expected to be 1.32-1.46, based on the  
215 previously referenced clinical utility study.<sup>26</sup> Assuming these HRs, a sample size of  
216 approximately 1453 subjects with outcomes in the prospective arm with 55%  
217 compliance among higher-risk subjects and approximately 10000 historical controls,  
218 would provide power of at least 0.8.<sup>27</sup>

219

220 **Statistical Analysis**

221 Descriptive statistics were used to describe all data. Variables were summarized using  
222 means and standard deviations for continuous data, and percentages and frequencies  
223 for categorical data. Comparisons for baseline characteristics were performed; the  
224 Wilcoxon rank sum test was used to compare continuous variables between two  
225 groups, and contingency table analysis (chi-square) was used to compare categorical  
226 variables. In comparisons, differences with  $P < 0.05$  were considered significant.

227 The first co-primary hypothesis, reduction in severe composite NMI scores, was  
228 tested using ordinal logistic regression, adjusted by covariates. The second co-primary  
229 hypothesis, reduction in neonatal length of stay, and the two co-secondary hypotheses,  
230 reduction in NICU length of stay (NICULOS) and increase in GA at birth (GAB), were all  
231 tested using Cox proportional hazards regression, adjusted by covariates.

232 The co-primary and co-secondary analyses used a modified intent-to-treat  
233 population, defined as all subjects for whom both co-primary outcomes were known;  
234 and who were either selected for the historical control arm, received a low-risk PreTRM  
235 test result, or consented to and initiated treatment with vaginal progesterone and  
236 LDASA <24 weeks' gestation after receiving a higher-risk PreTRM test result.

237 As prespecified by a selection procedure defined in the SAP, subjects in the  
238 highest 8.5% quantile of each arm were included in the NICULOS and NNLOS  
239 analyses, while subjects in the lowest 8.5% quantile of each arm were included in the  
240 GAB analysis. Specifically, 8.5% was selected to be 1.2 times the PTB rate of the

241 historical control arm (7.1%). This was done to examine outcomes at the extremes of  
242 PTB rather than capturing short NICU stays for conditions that tend to dominate NICU  
243 admissions, including transient tachypnea of the newborn, hypoglycemia and  
244 temperature instability.

245 As prespecified in the SAP, the covariates included in the models for the primary  
246 and secondary analyses were maternal age, parity and maternal substance use  
247 disorders, assessed as Neonatal Opioid Withdrawal Syndrome. Additional covariates  
248 were examined in sensitivity analyses.

249 Differences between the treatment arms in the proportion of each treatment  
250 group at each NMI level were calculated using the fitted ordinal logistic regression  
251 model with the covariates maternal age, parity and maternal substance use disorders.  
252 Percent differences between the treatment arms for time to event analyses were  
253 calculated using the hazard rate for each group as estimated by the fitted Cox  
254 proportional hazards model with the covariates maternal age, parity and maternal  
255 substance use disorders.

256 The proportional odds assumption for the effect of treatment arm in the ordinal  
257 logistic regression was examined and found not to be violated. The proportional hazards  
258 assumption for treatment arm in the Cox regression analyses was tested and found not  
259 to be violated.

260 Analyses were performed using R software version 4.2.2.<sup>32</sup> Two-tailed *P*-values  
261 <0.05 were considered significant. Holm's multiple comparisons correction was used for  
262 the co-primary hypotheses.

263

## 264 **Results**

265 At study termination, 1873 eligible subjects had been enrolled in the prospective arm,  
266 1463 of whom aligned with pre-COVID-19 patient care conditions and were screened  
267 with the PreTRM test (**Figure 1**). Of these, 34.7% (507/1463) were deemed higher risk  
268 by the PreTRM test. Among the screened population, 83.3% (1218/1463) had clinical  
269 outcomes and qualified either as low-risk (77.1%; 939/1218) or as higher-risk accepting  
270 treatment (22.9%; 279/1218).

271 Baseline participant characteristics and delivery data are shown in **Table 1**. The  
272 prospective arm was noted to be significantly older, more obese, less likely to be  
273 nulliparous, and more likely to have hypertension and smoke than historical controls.  
274 Similarly, body mass index was higher in the prospective arm compared to historical  
275 controls – mostly due to higher weight, though the prospective arm was nominally taller  
276 than historical controls. The proportion of Black women in both arms was 26.5%,  
277 reflecting the racial diversity in the study site’s patient population. Three women  
278 reported stopping vaginal progesterone due to adverse effects, and one woman  
279 discontinued LDASA.

280 Results of hypothesis tests for the co-primary and co-secondary outcomes are  
281 presented in **Table 2**. NNLOS was significantly reduced in the prospective arm vs the  
282 historical arm (HR 1.35; 95% CI, 1.08-1.7;  $P=0.01$ ). The Kaplan-Meier plot for NNLOS is  
283 shown in **Figure 2**, reflecting a reduction of mean NNLOS of 21% (Cox proportional  
284 hazard [PH]  $P = 0.01$ ). NMI scores were significantly reduced in the prospective arm vs

285 the historical arm (OR 0.81; 95% CI 0.67-0.98;  $P=0.03$ ), indicating more favorable  
286 outcomes for the prospective arm (**Table 2**). Specifically, the probability of NMI  $\geq 1$  (any  
287 impairment) or NMI  $\geq 3$  (severe NMI) was reduced on average approximately by 13%-  
288 17% or 18%, respectively, across a range of co-variate values (**Supplemental Table 1**).

289 After achieving statistical significance for both co-primary endpoints per the SAP,  
290 we proceeded to test the two co-secondary hypotheses. In Cox regression analysis,  
291 children tended to leave the NICU earlier (HR 1.2; 95%CI, 0.96-1.51), but this difference  
292 was not significant ( $P=0.12$ ). No differences in overall weeks' gestation was noted  
293 ( $P=0.584$ , HR 0.962).

294 In a non-prespecified analysis, we noted that although there was no difference in overall  
295 GA at delivery, there was a difference in the number of pregnancies that delivered <32  
296 weeks' gestation (HR, 0.52; 95%CI, 0.28-0.94; Cox PH  $P=0.009$ ) (**Figure 3**),  
297 corresponding to an extension of mean gestation for births <32 weeks of 2.5 weeks  
298 (mean of 27.46 and 29.93 weeks for historical and prospective arms, respectively).

299 **Figure 4** shows a Kaplan-Meier plot for neonatal hospital stay among babies born <32  
300 weeks. Neonates left the hospital earlier in the prospective arm than the historical arm  
301 (HR, 1.84, 95% CI 1.01-3.36, Cox PH  $P=0.046$ ) with differences in mean stays of  
302 approximately 30% (mean of 97.23 and 68.47 days for historical and prospective arms,  
303 respectively). This suggests that an increase in pregnancy duration amongst births <32  
304 weeks in the prospective arm was associated with shorter neonatal hospital stay.

305 Finally, in an exploratory analysis of all subjects (not only the 8.5%ile specified in  
306 the primary analysis) NNOLOS was reduced by 16% (mean of 5.1 and 4.28 days, HR:  
307 1.15, 95%CI, 1.08-1.22,  $P<0.001$ ) and 17% (mean 3.95 and 3.27 days, HR 1.15, 95%

308 CI, 1.08-1.22,  $P < 0.001$ ), with and without the adjustment for neonatal death,  
309 respectively.

310

## 311 **Comment**

### 312 ***Principal Findings***

313 The results of this trial demonstrate that women who were screened and stratified with a  
314 proteomic test for PTB risk, and were treated with care management, LDASA, and  
315 vaginal progesterone, had shorter NNLOS and less severe neonatal morbidities  
316 compared to a large historical arm, after controlling for population differences.

317

### 318 ***Results in the Context of What is Known***

319 Historically, evidence has existed for the benefit of intervening on pregnant women  
320 stratified by clinical risk factors. These data suggest that proteomic biomarker-based  
321 stratification and focused intervention may improve outcomes in otherwise low-risk  
322 women.

323

### 324 ***Clinical Implications***

325 These findings suggest a potential approach for universal screening and treatment to  
326 help ameliorate complications of PTB amongst women who lack traditional risk factors  
327 for preterm delivery. The results of this study resonate with an investigation<sup>33</sup> that  
328 randomized 1,191 women to either knowing and receiving treatment vs not knowing the



329 results of their screening test. In that study, the NICU length of stay due to sPTB was  
330 significantly less amongst those screened and treated vs. those not receiving their test  
331 results (median 6.8 days vs. 45.5 days;  $P=0.005$ ), though the study was limited by small  
332 numbers. We note that similar strategies of both evaluating prior pregnancy for PTB  
333 and/or routine cervical length have been widely accepted in many centers,<sup>28,29</sup> but this  
334 strategy captures a limited number of PTBs, and pregnancy history is not relevant for  
335 the first-time mothers who represent a sizable portion of the population.

336         Given the notable increase in PTB rate among Black women (14.4%) as  
337 compared to the U.S. population as a whole (10.2%),<sup>2</sup> it is important to note that Black  
338 participants were represented in the AVERT PRETERM prospective and historical arms  
339 with a proportion (26.5%) nearly double recent U.S. population estimates (13.6%).<sup>30</sup> The  
340 results in this study population, along with those in two large and similarly diverse  
341 studies,<sup>21,31</sup> indicate that the PreTRM test will be applicable across the diverse U.S.  
342 population.

343

#### 344 ***Research Implications***

345         Patient knowledge of preterm birth risk via validated proteomic testing may offer  
346 an opportunity to combine a novel risk assessment with strategies proven to be effective  
347 with clinical risk factors. Based on survey data, pregnant women are frequently resistant  
348 to taking medication due to perceived deleterious effects during pregnancy. Prospective  
349 trials randomizing women to being informed of results with clinical treatment vs testing  
350 with blinded results have begun and will provide more definitive evidence.

351

352 ***Strengths and Limitations***

353 Strengths of the trial include a multimodal strategy incorporating interventions that have  
354 consistently shown benefit in reducing the impacts of prematurity, as well as a novel  
355 proteomic blood test that has been validated in multiple cohorts. Additionally, we note  
356 that the dataset used to obtain the historical controls has been well validated, and all  
357 cases of PTB were reviewed. Clinically, the impact appears to be greatest amongst  
358 pregnancies delivering <34 weeks' gestation, which remains the primary driver of  
359 newborn and child morbidity and mortality.

360       Limitations of the study are inherent in the design of comparing a prospective  
361 arm that differed from the historical arm in several maternal demographic and medical  
362 conditions. These were addressed through multivariable modeling, but we note that this  
363 remains a potential source of bias. Even so, significant demographic differences in the  
364 prospective arm vs the historical arm – older age, more hypertension and more smoking  
365 – likely biases the prospective arm toward increased PTB incidence, further  
366 underscoring the importance of our findings. Additionally, at least for the use of LDASA,  
367 guideline changes have expanded the number of women eligible for treatment, and a  
368 recent estimate suggests that most pregnancies should be counseled about LDASA.<sup>38</sup>.  
369 Finally, we note some overlap of our co-primary outcomes, as NICULOS was also part  
370 of the NMI.

371

372 ***Conclusions***

373 In summary, (1) screening singleton, non-anomalous pregnancies lacking traditional  
374 clinical risk factors with a validated proteomic blood test for preterm birth prediction,  
375 then (2) targeting those with elevated risk for preventive treatment, improved neonatal  
376 outcomes as compared to a large historical population. This test-and-treatment strategy  
377 led to shorter hospital stays and improved NMI scores across a diverse population.

378

### 379 **Acknowledgements**

380 We wish to acknowledge the funding provided by Sera Prognostics, Inc., to conduct this  
381 independent investigation. Jennifer Logan, PhD, an employee of Sera Prognostics, Inc.,  
382 provided medical writing support for the manuscript.

## 383 **References**

- 384 1. Liu L, Oza S, Hogan D, et al. Global, regional, and national causes of under-5  
385 mortality in 2000-15: an updated systematic analysis with implications for the  
386 Sustainable Development Goals. *Lancet* 2016;388(10063):3027-3035. DOI:  
387 10.1016/S0140-6736(16)31593-8.
- 388 2. Osterman MJK, Hamilton BE, Martin, J.A., Driscoll AKV, C.P. Births: Final Data  
389 for 2020. Division of Vital Statistics, National Center for Health Statistics, U.S.  
390 Centers for Disease Control and Prevention. 2022 Feb 7. Available at  
391 <https://www.cdc.gov/nchs/nvss/births.htm>. Accessed February 9, 2022.
- 392 3. Moster D, Lie RT, Markestad T. Long-term medical and social consequences of  
393 preterm birth. *N Engl J Med* 2008;359(3):262-73. DOI:  
394 10.1056/NEJMoa0706475.
- 395 4. Crump C, Sundquist K, Sundquist J, Winkleby MA. Gestational age at birth and  
396 mortality in young adulthood. *JAMA* 2011;306(11):1233-40. DOI:  
397 10.1001/jama.2011.1331.
- 398 5. Sun BZ, Moster D, Harmon QE, Wilcox AJ. Association of Preeclampsia in Term  
399 Births With Neurodevelopmental Disorders in Offspring. *JAMA Psychiatry*  
400 2020;77(8):823-829. DOI: 10.1001/jamapsychiatry.2020.0306.
- 401 6. Tyson JE, Parikh NA, Langer J, Green C, Higgins RD, National Institute of Child  
402 H, Human Development Neonatal Research N. Intensive care for extreme  
403 prematurity--moving beyond gestational age. *N Engl J Med* 2008;358(16):1672-  
404 81. DOI: 10.1056/NEJMoa073059.

- 405 7. Richardson DK, Gray JE, Gortmaker SL, Goldmann DA, Pursley DM, McCormick  
406 MC. Declining severity adjusted mortality: evidence of improving neonatal  
407 intensive care. *Pediatrics* 1998;102(4 Pt 1):893-9. DOI: 10.1542/peds.102.4.893.
- 408 8. Crowley PA. Antenatal corticosteroid therapy: a meta-analysis of the randomized  
409 trials, 1972 to 1994. *Am J Obstet Gynecol* 1995;173(1):322-35. DOI:  
410 10.1016/0002-9378(95)90222-8.
- 411 9. Garite TJ, Manuck TA. Should case management be considered a component of  
412 obstetrical interventions for pregnancies at risk of preterm birth? *Am J Obstet*  
413 *Gynecol* 2023;228(4):430-437. DOI: 10.1016/j.ajog.2022.09.022.
- 414 10. Hoffman MK, Goudar SS, Kodkany BS, et al. Low-dose aspirin for the prevention  
415 of preterm delivery in nulliparous women with a singleton pregnancy (ASPIRIN):  
416 a randomised, double-blind, placebo-controlled trial. *Lancet*  
417 2020;395(10220):285-293. DOI: 10.1016/S0140-6736(19)32973-3.
- 418 11. Hassan SS, Romero R, Vidyadhari D, et al. Vaginal progesterone reduces the  
419 rate of preterm birth in women with a sonographic short cervix: a multicenter,  
420 randomized, double-blind, placebo-controlled trial. *Ultrasound Obstet Gynecol*  
421 2011;38(1):18-31. DOI: 10.1002/uog.9017.
- 422 12. Fonseca EB, Celik E, Parra M, Singh M, Nicolaides KH, Fetal Medicine  
423 Foundation Second Trimester Screening G. Progesterone and the risk of preterm  
424 birth among women with a short cervix. *N Engl J Med* 2007;357(5):462-9. DOI:  
425 10.1056/NEJMoa067815.
- 426 13. Iams JD, Goldenberg RL, Meis PJ, et al. The length of the cervix and the risk of  
427 spontaneous premature delivery. National Institute of Child Health and Human

- 428 Development Maternal Fetal Medicine Unit Network. N Engl J Med  
429 1996;334(9):567-72. DOI: 10.1056/NEJM199602293340904.
- 430 14. Cahill AG, Odibo AO, Caughey AB, Stamilio DM, Hassan SS, Macones GA,  
431 Romero R. Universal cervical length screening and treatment with vaginal  
432 progesterone to prevent preterm birth: a decision and economic analysis. Am J  
433 Obstet Gynecol 2010;202(6):548 e1-8. DOI: 10.1016/j.ajog.2009.12.005.
- 434 15. Esplin MS, Elovitz MA, Iams JD, et al. Predictive Accuracy of Serial Transvaginal  
435 Cervical Lengths and Quantitative Vaginal Fetal Fibronectin Levels for  
436 Spontaneous Preterm Birth Among Nulliparous Women. Jama  
437 2017;317(10):1047-1056. DOI: 10.1001/jama.2017.1373.
- 438 16. Berghella V, Saccone G. Cervical assessment by ultrasound for preventing  
439 preterm delivery. Cochrane Database Syst Rev 2019;9(9):CD007235. DOI:  
440 10.1002/14651858.CD007235.pub4.
- 441 17. Duley L, Meher S, Hunter KE, Seidler AL, Askie LM. Antiplatelet agents for  
442 preventing pre-eclampsia and its complications. Cochrane Database Syst Rev  
443 2019;2019(10). DOI: 10.1002/14651858.CD004659.pub3.
- 444 18. Low dose aspirin in pregnancy and early childhood development: follow up of the  
445 collaborative low dose aspirin study in pregnancy. CLASP collaborative group. Br  
446 J Obstet Gynaecol 1995;102(11):861-8. DOI: 10.1111/j.1471-  
447 0528.1995.tb10872.x.
- 448 19. Henderson JT, Vesco KK, Senger CA, Thomas RG, Redmond N. Aspirin Use to  
449 Prevent Preeclampsia and Related Morbidity and Mortality: Updated Evidence

- 450 Report and Systematic Review for the US Preventive Services Task Force.  
451 JAMA 2021;326(12):1192-1206. DOI: 10.1001/jama.2021.8551.
- 452 20. Newman RB, Sullivan SA, Menard MK, Rittenberg CS, Rowland AK, Korte JE,  
453 Kirby H. South Carolina Partners for Preterm Birth Prevention: a regional  
454 perinatal initiative for the reduction of premature birth in a Medicaid population.  
455 Am J Obstet Gynecol 2008;199(4):393 e1-8. DOI: 10.1016/j.ajog.2008.07.047.
- 456 21. Saade GR, Boggess KA, Sullivan SA, et al. Development and validation of a  
457 spontaneous preterm delivery predictor in asymptomatic women. Am J Obstet  
458 Gynecol 2016;214(5):633 e1-633 e24. DOI: 10.1016/j.ajog.2016.02.001.
- 459 22. Burchard J, Polpitiya AD, Fox AC, et al. Clinical Validation of a Proteomic  
460 Biomarker Threshold for Increased Risk of Spontaneous Preterm Birth and  
461 Associated Clinical Outcomes: A Replication Study. J Clin Med  
462 2021;10(21):5088. DOI: 10.3390/jcm10215088.
- 463 23. Khalil A, von Dadelszen P, Draycott T, Ugwumadu A, O'Brien P, Magee L.  
464 Change in the Incidence of Stillbirth and Preterm Delivery During the COVID-19  
465 Pandemic. JAMA 2020;324(7):705-6. DOI: 10.1001/jama.2020.12746.
- 466 24. Bradford C, Severinsen R, Pugmire T, et al. Analytical validation of protein  
467 biomarkers for risk of spontaneous preterm birth. Clinical Mass Spectrometry  
468 2017;3:25-38. DOI: 10.1016/j.clinms.2017.06.002.
- 469 25. Zhang J, Troendle J, Reddy UM, et al. Contemporary cesarean delivery practice  
470 in the United States. Am J Obstet Gynecol 2010;203(4):326 e1-326 e10. DOI:  
471 10.1016/j.ajog.2010.06.058.

- 472 26. Branch DW, VanBuren JM, Porter TF, et al. Prediction and Prevention of Preterm  
473 Birth: A Prospective, Randomized Intervention Trial. Am J Perinatol 2021. DOI:  
474 10.1055/s-0041-1732339.
- 475 27. NCSS Statistical Software. Group-Sequential Analysis for Two Proportions.  
476 Available at [https://www.ncss.com/wp-](https://www.ncss.com/wp-content/themes/ncss/pdf/Procedures/NCSS/Group-Sequential%20Analysis%20for%20Two%20Proportions.pdf)  
477 [content/themes/ncss/pdf/Procedures/NCSS/Group-](https://www.ncss.com/wp-content/themes/ncss/pdf/Procedures/NCSS/Group-Sequential%20Analysis%20for%20Two%20Proportions.pdf)  
478 [Sequential Analysis for Two Proportions.pdf](https://www.ncss.com/wp-content/themes/ncss/pdf/Procedures/NCSS/Group-Sequential%20Analysis%20for%20Two%20Proportions.pdf). Accessed May 1, 2023.
- 479 28. Son M, Grobman WA, Ayala NK, Miller ES. A universal mid-trimester  
480 transvaginal cervical length screening program and its associated reduced  
481 preterm birth rate. Am J Obstet Gynecol 2016;214(3):365 e1-5. DOI:  
482 10.1016/j.ajog.2015.12.020.
- 483 29. Werner EF, Hamel MS, Orzechowski K, Berghella V, Thung SF. Cost-  
484 effectiveness of transvaginal ultrasound cervical length screening in singletons  
485 without a prior preterm birth: an update. Am J Obstet Gynecol 2015;213(4):554  
486 e1-6. DOI: 10.1016/j.ajog.2015.06.020.
- 487 30. U.S. Census Bureau. Quick Facts. Available at  
488 <https://www.census.gov/quickfacts/fact/table/US/PST045222>. Accessed July 18,  
489 2023.
- 490 31. Markenson GR, Saade GR, Laurent LC, et al. Performance of a proteomic  
491 preterm delivery predictor in a large independent prospective cohort. Am J  
492 Obstet Gynecol MFM 2020;2(3):100140. DOI: 10.1016/j.ajogmf.2020.100140.

493



494 **Table 1. Baseline characteristics and delivery data**

|                                    | Historical  | Prospective  | Prospective (low risk) | Prospective (higher risk accepting treatment) | P-value (prospective vs historical) <sup>†</sup> |
|------------------------------------|-------------|--------------|------------------------|-----------------------------------------------|--------------------------------------------------|
| N                                  | 10000       | 1218         | 939                    | 279                                           |                                                  |
| Age                                |             |              |                        |                                               | <0.001                                           |
| N                                  | 10000       | 1218         | 939                    | 279                                           |                                                  |
| Mean (SD)                          | 29.6 (5.4)  | 30.5 (5.7)   | 30.5 (5.6)             | 30.5 (5.9)                                    |                                                  |
| Gravida                            |             |              |                        |                                               | <0.001                                           |
| N                                  | 9954        | 1135         | 874                    | 261                                           |                                                  |
| Mean (SD)                          | 2.7 (1.7)   | 2.41 (1.5)   | 2.45 (1.6)             | 2.27 (1.4)                                    |                                                  |
| Parity                             |             |              |                        |                                               | <0.001                                           |
| N                                  | 9953        | 1159         | 893                    | 266                                           |                                                  |
| Mean (SD)                          | 1.1 (1.2)   | 0.9 (1.1)    | 0.9 (1.1)              | 0.7 (1.0)                                     |                                                  |
| Percent nulliparous [N, (%)]       | 6544 (65.7) | 630 (54.4)   | 507 (56.8)             | 123 (46.2)                                    | <0.001                                           |
| Number of miscarriages             |             |              |                        |                                               | 0.25                                             |
| N                                  | 9953        | 1130         | 870                    | 260                                           |                                                  |
| Mean (SD)                          | 1.6 (1.1)   | 1.6 (1.0)    | 1.6 (1.0)              | 1.6 (0.9)                                     |                                                  |
| Race <sup>‡</sup> [N, (%)]         |             |              |                        |                                               | <0.001                                           |
| American Indian                    | 21 (0.2)    | 1 (0.1)      | 0 (0.0)                | 1 (0.4)                                       |                                                  |
| Asian                              | 783 (7.8)   | 76 (6.3)     | 55 (5.9)               | 21 (7.6)                                      |                                                  |
| Black                              | 2653 (26.5) | 322 (26.5)   | 259 (27.7)             | 63 (22.7)                                     |                                                  |
| Other                              | 909 (9.1)   | 74 (6.1)     | 53 (5.7)               | 21 (7.6)                                      |                                                  |
| White                              | 5634 (56.3) | 740 (61.0)   | 568 (60.7)             | 172 (61.9)                                    |                                                  |
| Prepregnancy BMI                   |             |              |                        |                                               | 0.04                                             |
| N                                  | 9476        | 728          | 562                    | 166                                           |                                                  |
| Mean (SD)                          | 27.5 (8.5)  | 28.2 (7.6)   | 27.5 (7.7)             | 30.4(6.7)                                     |                                                  |
| BMI <19 kg/M <sup>2</sup> [N, (%)] | 403 (4.3)   | 32 (4.4)     | 28 (5)                 | 4 (2.4)                                       | 0.85                                             |
| Height (inches)                    |             |              |                        |                                               | <0.001                                           |
| N                                  | 9838        | 1033         | 797                    | 236                                           |                                                  |
| Mean (SD)                          | 64.1 (2.7)  | 64.48 (2.69) | 64.44 (2.69)           | 64.62 (2.7)                                   |                                                  |
| Diabetes [N, (%)]                  | 127 (1.3)   | 19 (1.6)     | 14 (1.5)               | 5 (1.8)                                       | 0.42                                             |
| Opioid Use [N, (%)]                | 242 (2.4)   | 13 (1.1)     | 11 (1.2)               | 2 (0.7)                                       | 0                                                |
| Hypertension [N, (%)]              | 606 (6.1)   | 105 (8.6)    | 72 (7.7)               | 33 (11.9)                                     | <0.001                                           |
| Smoking [N, (%)]                   | 709 (7.8)   | 100 (9.5)    | 70 (8.6)               | 30 (12.3)                                     | 0.06                                             |
| Insurance type [N, (%)]            |             |              |                        |                                               | 0.67                                             |
| Government                         | 2969 (29.7) | 315 (28.6)   | 244 (28.5)             | 71 (28.6)                                     |                                                  |
| Other                              | 19 (0.2)    | 1 (0.1)      | 1 (0.1)                | 0 (0)                                         |                                                  |
| Private                            | 7012 (70.1) | 787 (71.4)   | 610 (71.3)             | 177 (71.4)                                    |                                                  |
| Delivery type [N, (%)]             |             |              |                        |                                               | <0.001                                           |
| Dilation & evacuation              | 0 (0.0)     | 1 (0.1)      | 0 (0.0)                | 1 (0.2)                                       |                                                  |
| Primary cesarean delivery          | 1577 (15.8) | 283 (20.2)   | 164 (17.9)             | 119 (24.5)                                    |                                                  |
| Repeat cesarean delivery           | 1541 (15.4) | 177 (12.6)   | 119 (13.0)             | 58 (12.0)                                     |                                                  |
| Vaginal delivery                   | 6630 (66.3) | 923 (65.8)   | 624 (68)               | 299 (61.6)                                    |                                                  |
| Vaginal delivery after cesarean    | 252 (2.5)   | 18 (1.3)     | 10 (1.1)               | 8 (1.6)                                       |                                                  |

495 <sup>†</sup>P-value reflects comparison of prospective vs historical arm.

496 <sup>‡</sup>Race is based on self-report.

497 BMI, body mass index.

498 **Table 2: Results of hypothesis tests for the co-primary and co-secondary**  
 499 **outcomes using prespecified covariates**

| <b>Co-primary endpoints</b>                              |                     |                               |                               |                |
|----------------------------------------------------------|---------------------|-------------------------------|-------------------------------|----------------|
|                                                          | <b>Hazard ratio</b> | <b>Lower confidence limit</b> | <b>Upper confidence limit</b> | <b>P-value</b> |
| Neonatal length of hospital stay <sup>†</sup>            |                     |                               |                               |                |
| Study arm prospective                                    | 1.35                | 1.08                          | 1.70                          | 0.01           |
| Parous or nulliparous                                    | 0.94                | 0.82                          | 1.08                          | 0.39           |
| Age                                                      | 1.00                | 0.99                          | 1.01                          | 0.75           |
| Opioid use                                               | 1.53                | 1.30                          | 1.79                          | <0.001         |
|                                                          |                     |                               |                               |                |
|                                                          | <b>Odds ratio</b>   | <b>Lower confidence limit</b> | <b>Upper confidence limit</b> | <b>P-value</b> |
| Neonatal morbidity index <sup>‡</sup>                    |                     |                               |                               |                |
| Study arm prospective                                    | 0.81                | 0.67                          | 0.98                          | 0.03           |
| Parous or nulliparous                                    | 0.58                | 0.52                          | 0.65                          | 0              |
| Age                                                      | 1.01                | 1.00                          | 1.02                          | 0.13           |
| Opioid use                                               | 2.62                | 1.97                          | 3.45                          | <0.001         |
|                                                          |                     |                               |                               |                |
| <b>Co-secondary endpoints</b>                            |                     |                               |                               |                |
|                                                          | <b>Hazard ratio</b> | <b>Lower confidence limit</b> | <b>Upper confidence limit</b> | <b>P-value</b> |
| Neonatal intensive care unit length of stay <sup>†</sup> |                     |                               |                               |                |
| Study arm prospective                                    | 1.20                | 0.96                          | 1.51                          | 0.12           |
| Parous or nulliparous                                    | 0.96                | 0.84                          | 1.10                          | 0.57           |
| Age                                                      | 1.00                | 0.99                          | 1.01                          | 0.78           |
| Opioid use                                               | 2.36                | 1.71                          | 3.27                          | <0.001         |
|                                                          |                     |                               |                               |                |
|                                                          | <b>Hazard ratio</b> | <b>Lower confidence limit</b> | <b>Upper confidence limit</b> | <b>P-value</b> |
| Gestational age (weeks)                                  |                     |                               |                               |                |
| Study arm                                                | 0.96                | 0.84                          | 1.10                          | 0.58           |
| Parous or nulliparous                                    | 0.85                | 0.77                          | 0.93                          | <0.001         |
| Age                                                      | 1.00                | 0.99                          | 1.01                          | 0.93           |
| Opioid use                                               | 0.91                | 0.73                          | 1.14                          | 0.41           |

500 The co-primary and co-secondary outcomes included subjects in the upper 8.5%  
 501 quantile of neonatal length of stay, neonatal morbidity index score, and neonatal  
 502 intensive care unit length of stay within each arm, so that the large proportion of normal  
 503 births would not dilute the differences between arms.

504 <sup>†</sup>Cox regression analysis

505 <sup>‡</sup>Ordinal logistic regression analysis

506 **Figure 1. Consort diagram for study inclusion**

507

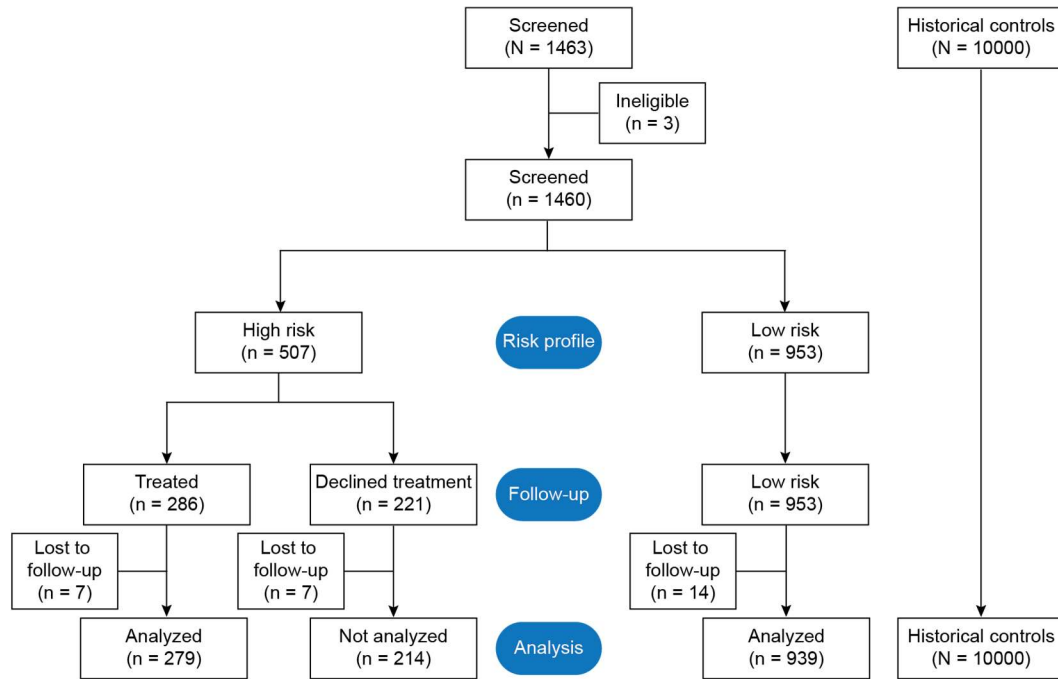

509 **Figure 2: Kaplan-Meier curves for neonatal hospital length of stay**

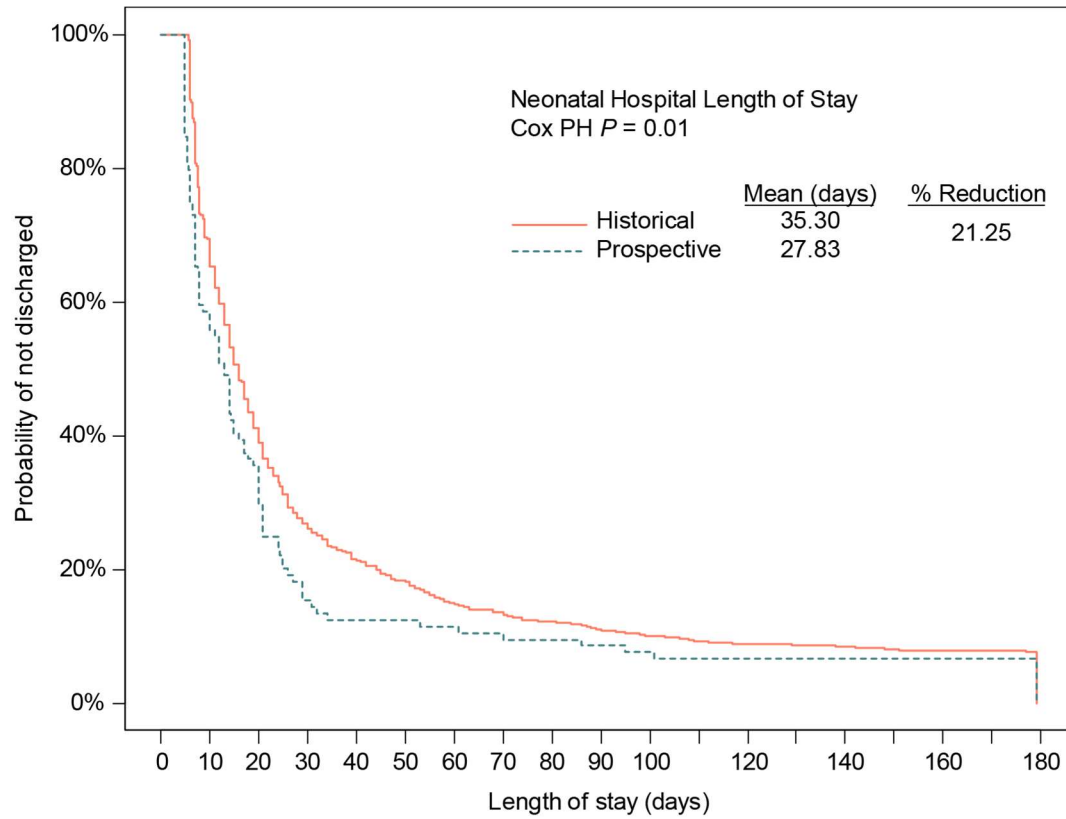

510

|             |     |     |     |     |     |     |     |     |     |    |    |    |    |    |    |    |    |    |
|-------------|-----|-----|-----|-----|-----|-----|-----|-----|-----|----|----|----|----|----|----|----|----|----|
| Historical  | 858 | 588 | 353 | 231 | 186 | 158 | 130 | 117 | 106 | 96 | 87 | 80 | 76 | 75 | 73 | 70 | 68 | 68 |
| Prospective | 104 | 60  | 37  | 16  | 13  | 13  | 12  | 11  | 10  | 9  | 8  | 7  | 7  | 7  | 7  | 7  | 7  | 7  |

511 **Figure 3: Kaplan-Meier curves for gestational age (weeks) for babies born <32**  
 512 **weeks' gestation**

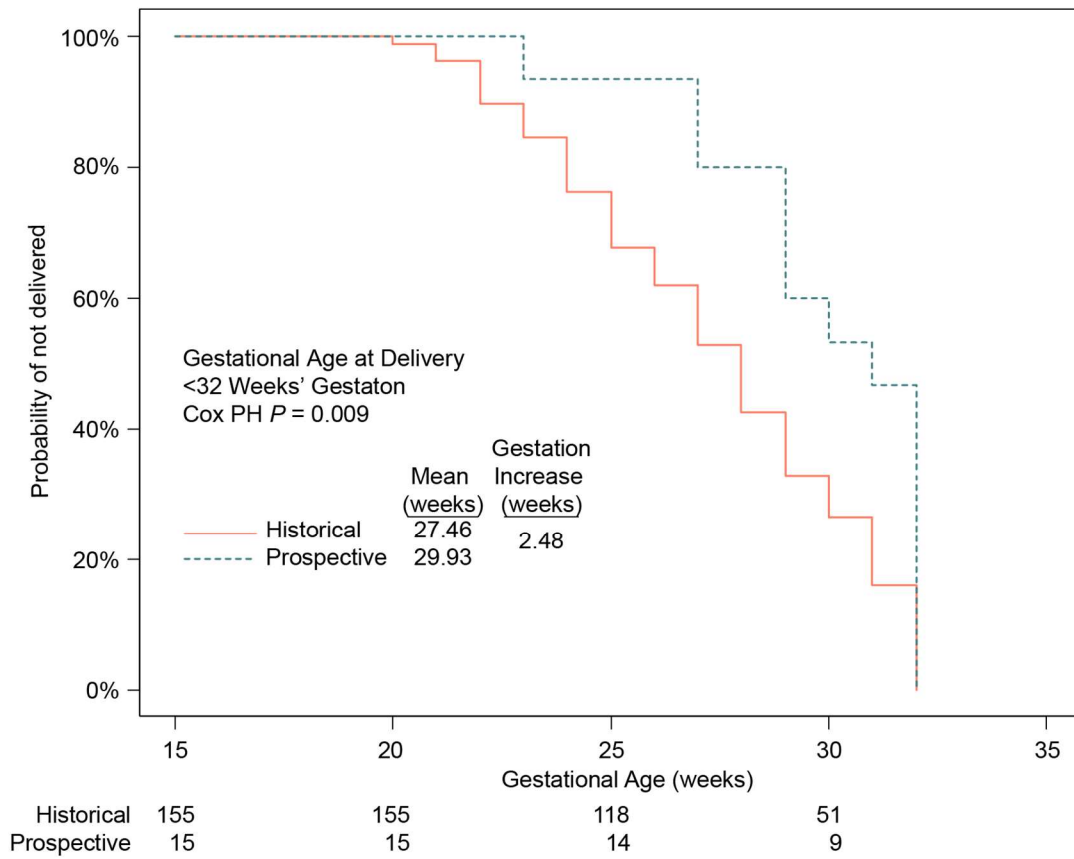

513

514 **Figure 4: Kaplan-Meier curves for neonatal length of hospital stay (days) for**  
 515 **babies born <32 weeks' gestation**

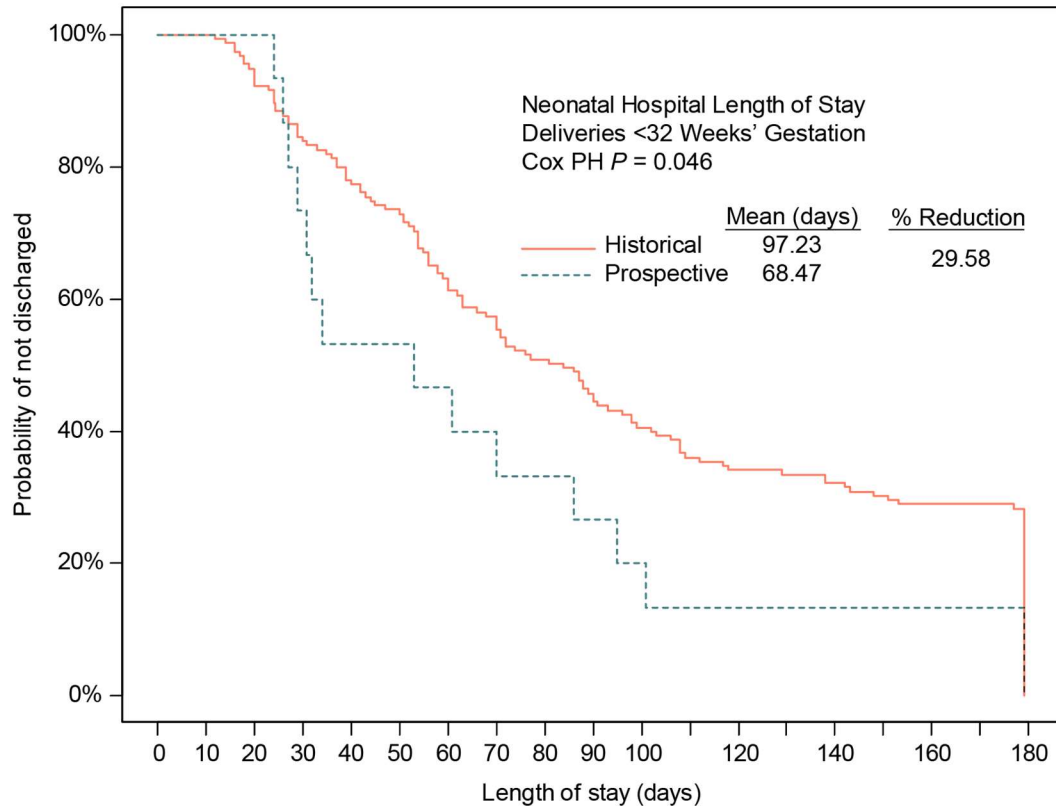

516

|             |     |     |     |     |     |     |    |    |    |    |    |    |    |    |    |    |    |    |
|-------------|-----|-----|-----|-----|-----|-----|----|----|----|----|----|----|----|----|----|----|----|----|
| Historical  | 155 | 155 | 147 | 131 | 121 | 114 | 98 | 89 | 79 | 71 | 63 | 56 | 53 | 52 | 50 | 47 | 45 | 45 |
| Prospective | 15  | 15  | 15  | 11  | 8   | 8   | 7  | 6  | 5  | 4  | 3  | 2  | 2  | 2  | 2  | 2  | 2  | 2  |

517

518 **Supplementary Table 1. Comparison of probabilities of NMI levels and percent**  
 519 **differences in probabilities between arms for a range of co-variate values.**

| Arm         | Multiparous | Age | Opioid Use | Predicted probabilities of NMI categories |         |         |         |         |          |          | Percent reduction in risks in Prospective arm relative to Control arm |          |
|-------------|-------------|-----|------------|-------------------------------------------|---------|---------|---------|---------|----------|----------|-----------------------------------------------------------------------|----------|
|             |             |     |            | NMI = 0                                   | NMI = 1 | NMI = 2 | NMI = 3 | NMI = 4 | NMI >= 3 | NMI >= 1 | NMI >= 3                                                              | NMI >= 1 |
| Historical  | No          | 30  | No         | 0.831                                     | 0.082   | 0.055   | 0.024   | 0.009   | 0.033    | 0.169    |                                                                       |          |
| Prospective | No          | 30  | No         | 0.858                                     | 0.069   | 0.045   | 0.020   | 0.007   | 0.027    | 0.142    | 18.47%                                                                | 16.29%   |
| Historical  | Yes         | 30  | No         | 0.894                                     | 0.053   | 0.034   | 0.014   | 0.005   | 0.020    | 0.106    |                                                                       |          |
| Prospective | Yes         | 30  | No         | 0.912                                     | 0.044   | 0.028   | 0.012   | 0.004   | 0.016    | 0.088    | 18.68%                                                                | 17.32%   |
| Historical  | No          | 30  | Yes        | 0.652                                     | 0.147   | 0.119   | 0.060   | 0.022   | 0.082    | 0.348    |                                                                       |          |
| Prospective | No          | 30  | Yes        | 0.698                                     | 0.132   | 0.102   | 0.050   | 0.018   | 0.068    | 0.302    | 17.69%                                                                | 13.24%   |
| Historical  | Yes         | 30  | Yes        | 0.763                                     | 0.109   | 0.078   | 0.036   | 0.013   | 0.050    | 0.237    |                                                                       |          |
| Prospective | Yes         | 30  | Yes        | 0.799                                     | 0.095   | 0.066   | 0.030   | 0.011   | 0.041    | 0.201    | 18.21%                                                                | 15.16%   |
| Historical  | No          | 20  | No         | 0.842                                     | 0.077   | 0.051   | 0.023   | 0.008   | 0.031    | 0.158    |                                                                       |          |
| Prospective | No          | 20  | No         | 0.868                                     | 0.065   | 0.042   | 0.018   | 0.006   | 0.025    | 0.132    | 18.51%                                                                | 16.47%   |
| Historical  | Yes         | 20  | No         | 0.901                                     | 0.049   | 0.031   | 0.013   | 0.005   | 0.018    | 0.099    |                                                                       |          |
| Prospective | Yes         | 20  | No         | 0.919                                     | 0.041   | 0.026   | 0.011   | 0.004   | 0.015    | 0.081    | 18.70%                                                                | 17.44%   |
| Historical  | No          | 20  | Yes        | 0.670                                     | 0.141   | 0.113   | 0.056   | 0.021   | 0.076    | 0.330    |                                                                       |          |
| Prospective | No          | 20  | Yes        | 0.715                                     | 0.127   | 0.096   | 0.046   | 0.017   | 0.063    | 0.285    | 17.79%                                                                | 13.56%   |
| Historical  | Yes         | 20  | Yes        | 0.777                                     | 0.103   | 0.073   | 0.034   | 0.012   | 0.046    | 0.223    |                                                                       |          |
| Prospective | Yes         | 20  | Yes        | 0.812                                     | 0.090   | 0.061   | 0.028   | 0.010   | 0.038    | 0.188    | 18.27%                                                                | 15.40%   |
| Historical  | No          | 40  | No         | 0.819                                     | 0.087   | 0.059   | 0.026   | 0.009   | 0.036    | 0.181    |                                                                       |          |
| Prospective | No          | 40  | No         | 0.848                                     | 0.074   | 0.049   | 0.022   | 0.008   | 0.029    | 0.152    | 18.43%                                                                | 16.10%   |
| Historical  | Yes         | 40  | No         | 0.886                                     | 0.057   | 0.036   | 0.016   | 0.005   | 0.021    | 0.114    |                                                                       |          |
| Prospective | Yes         | 40  | No         | 0.906                                     | 0.047   | 0.030   | 0.013   | 0.004   | 0.017    | 0.094    | 18.65%                                                                | 17.19%   |
| Historical  | No          | 40  | Yes        | 0.633                                     | 0.152   | 0.126   | 0.065   | 0.024   | 0.089    | 0.367    |                                                                       |          |
| Prospective | No          | 40  | Yes        | 0.680                                     | 0.138   | 0.109   | 0.053   | 0.020   | 0.073    | 0.320    | 17.59%                                                                | 12.91%   |
| Historical  | Yes         | 40  | Yes        | 0.748                                     | 0.115   | 0.084   | 0.039   | 0.014   | 0.054    | 0.252    |                                                                       |          |
| Prospective | Yes         | 40  | Yes        | 0.785                                     | 0.100   | 0.070   | 0.032   | 0.012   | 0.044    | 0.215    | 18.15%                                                                | 14.91%   |

NMI, neonatal morbidity index
